# Supplementary material for: Roles of Exposure Time and Geochemical Factors in the Characteristics of the Surface Sediments of the Hwangdo Tidal Flat, Taean, Cheonsu Bay, West Coast of Korea
Source: Preprints.org preprint supplement (doi:10.20944/preprints202307.0294.v2), 2023-08-24
Supplement: Supplementary file 1 [file supplementary]

## Sheet: dataset
											** Graphic Method by Folk and Ward(1957)
St No.(Lab.)	STATION NUM.	RTK									Composition (%)				Statistical Parameters				Sediment Type (facies)	Dry bulk density	Sediment porosity	Water content (%)	Total organic carbon(TOC)	Total carbon(TC)	C/N ratio	TN	TIC(CaCO3, calcium carbonate)	Salinity in porewater
		year	month	day	Hour	Min.	Northing	Easting	Ellipsoid Height	Orthometric height (H)	Gravel	Sand	Silt	Clay	Mean(φ)	Sorting(φ)	Skewness	Kurtosis	by Folk(1957)**	g/ml	-	%	%	%	ratio	%	%	psu
294	A6	2022	10	26	11	41	4.05162e+06	265987	22.474	0.114	0	43.4	44.76	11.84	4.695	1.924	0.604	2.018	sZ	1.42584	0.43511	25.5731	0.139031	0.146578	5.77317	0.0240823	0.0628902	49.2
295	A8	2022	10	26	11	46	4.05162e+06	266101	22.358	-0.002	0	61.48	26.48	12.04	4.403	1.939	0.69	2.317	zS	1.28242	0.449281	26.682	0.133945	0.199132	6.58548	0.0203395	0.543218	38.1612
296	A10	2022	10	26	11	52	4.05162e+06	266223	22.192	-0.168	0	62.58	25.66	11.76	4.313	1.946	0.676	2.461	zS	1.26736	0.482767	29.3966	0.135848	0.199245	7.96347	0.0170588	0.528313	42.8505
297	A12	2022	10	26	11	58	4.05162e+06	266335	21.935	-0.425	0	53.05	34.45	12.5	4.754	2.086	0.707	1.848	zS	1.3235	0.411696	23.7905	0.108373	0.177244	5.95721	0.0181919	0.573925	52.4447
298	A14	2022	10	26	12	5	4.05161e+06	266470	21.534	-0.826	0	56.94	29.71	13.35	4.75	2.15	0.713	1.841	zS	1.33086	0.445149	26.3563	0.102089	0.162503	6.5953	0.0154791	0.503452	51.9596
299	A16	2022	10	27	8	55	4.05161e+06	266586	21.343	-1.017	0	59.96	25.9	14.14	4.783	2.275	0.719	1.851	mS	1.38788	0.423905	24.7125	0.134985	0.197941	6.22167	0.0216959	0.524632	31.5315
300	A18	2022	10	27	9	0	4.0516e+06	266699	21.094	-1.266	0	62.59	22.67	14.74	4.697	2.405	0.702	1.639	mS	1.37644	0.406013	23.3668	0.0911498	0.232071	6.01337	0.0151578	1.17434	33.9031
301	A20	2022	10	27	9	7	4.05159e+06	266822	20.681	-1.679	0	47.89	37.92	14.19	4.963	2.166	0.704	2.015	sZ	1.29824	0.467149	28.1136	0.126953	0.193155	7.24621	0.0175199	0.551685	29.5911
302	A22	2022	10	27	9	19	4.05159e+06	266942	20.482	-1.878	1.06	56.41	27.45	15.08	4.851	2.416	0.685	1.507	(g)mS	1.33304	0.472467	28.5471	0.158667	0.239	6.71764	0.0236195	0.669437	32.6634
303	A24	2022	10	27	9	25	4.05159e+06	267062	20.301	-2.059	6.58	45.06	24.82	23.54	4.746	4.519	0.193	0.776	gM	1.09936	0.548504	35.1464	0.272778	0.273487	9.07692	0.0300518	0.00591	35.0889
304	H16-1	2022	10	27	10	25	4.05172e+06	265999	22.334	-0.026	0	34.43	45.76	19.81	5.926	2.664	0.679	1.046	sZ	1.2898	0.47996	29.1638	0.196958	0.605945	4.45893	0.0441716	3.40822	41.4491
305	H17-1	2022	10	27	10	18	4.05172e+06	266111	22.3	-0.06	0	71.86	17.45	10.69	4.102	1.822	0.703	3.076	mS	1.38736	0.397002	22.702	0.148433	0.197651	8.4665	0.0175319	0.410147	39.6165
306	H18-1	2022	10	27	10	14	4.05171e+06	266227	21.948	-0.412	0	66	23.39	10.61	4.248	1.89	0.667	2.558	zS	1.35512	0.510415	31.7437	0.101713	0.160303	6.04885	0.0168152	0.488249	37.2449
307	H19-1	2022	10	27	10	9	4.05171e+06	266349	21.838	-0.522	0	60.6	27.88	11.52	4.287	1.952	0.637	2.277	zS	1.33538	0.435582	25.6097	0.104965	0.18107	6.15813	0.0170449	0.634207	38.808
308	H20-1	2022	10	27	10	3	4.05171e+06	266468	21.382	-0.978	0	56.72	30.08	13.2	4.525	2.29	0.617	1.573	zS	1.41422	0.401471	23.0306	0.122574	0.174696	6.86804	0.017847	0.434349	38.6463
309	H21-1	2022	10	27	9	58	4.05171e+06	266587	21.222	-1.138	0	51.26	31.59	17.15	5.175	2.576	0.675	1.309	mS	1.3492	0.464127	27.8688	0.181073	0.262815	6.60903	0.0273978	0.681186	37.4605
310	H22-1	2022	10	27	9	52	4.05171e+06	266707	21.113	-1.247	0.36	69.95	17.33	12.36	4.09	2.272	0.636	2.056	(g)mS	1.53112	0.400083	22.9284	0.103998	0.170708	6.23971	0.0166671	0.55592	31.1003
311	H23-1	2022	10	27	9	46	4.0517e+06	266831	21.12	-1.24	14.31	57.24	14.49	13.96	3.159	3.944	0.142	1.831	gmS	1.46292	0.392855	22.3989	0.253858	0.420651	7.33098	0.0346282	1.38994	33.3102
312	H24-1	2022	10	27	9	40	4.0517e+06	266954	21.093	-1.267	9.43	60.47	17.96	12.14	3.308	3.448	0.171	2.32	gmS	1.36228	0.449788	26.7221	0.28411	0.618748	7.65747	0.0371024	2.78865	32.4478
313	H25-1	2022	10	27	9	29	4.0517e+06	267086	22.114	-0.246	30.7	61.39	2.89	5.02	0.031	2.448	0.347	1.865	msG	1.48642	0.388215	22.0619	0.102003	0.419661	6.02234	0.0169374	2.64715	32.4478
314	H27	2022	10	28	9	56	4.05193e+06	265689	21.667	-0.693	0	14.42	46.16	39.42	7.069	2.831	0.239	0.513	sM	0.95802	0.593246	39.4164	0.472443	0.635317	7.79304	0.0606237	1.35728	35.4123
315	H28	2022	10	28	10	0	4.05193e+06	265797	22.612	0.252	0	26.15	49.76	24.09	6.292	2.775	0.458	0.814	sZ	1.34702	0.486477	29.7058	0.434084	0.472853	8.39435	0.0517114	0.323077	41.4491
316	H29	2022	10	27	10	45	4.05192e+06	265956	22.501	0.141	0	32.35	48.9	18.75	5.735	2.554	0.616	1.189	sZ	1.32638	0.481873	29.3223	0.214149	0.290074	7.94741	0.0269458	0.632703	45.8689
317	H30	2022	10	27	10	50	4.05192e+06	266044	22.301	-0.059	0	65.38	21.79	12.83	4.523	2.151	0.699	2.163	mS	1.27088	0.465471	27.9775	0.137459	0.244966	8.10123	0.0169677	0.895885	33.7953
318	H31	2022	10	27	10	57	4.05192e+06	266168	22.199	-0.161	0	54.63	31.95	13.42	4.677	2.219	0.663	1.709	zS	1.2926	0.430221	25.1959	0.0755389	0.126837	7.8405	0.00963445	0.427489	44.737
319	H32	2022	10	27	11	1	4.05191e+06	266283	21.919	-0.441	0	54.87	31.36	13.77	4.705	2.238	0.669	1.815	zS	1.28844	0.409717	23.6426	0.0970121	0.162317	7.77859	0.0124717	0.544205	43.6051
320	H33	2022	10	27	11	6	4.05191e+06	266406	21.549	-0.811	0	52.89	30.03	17.08	5.158	2.598	0.684	1.43	mS	1.28618	0.489724	29.9779	0.159031	0.314242	7.13104	0.0223012	1.29343	41.1257
321	H34	2022	10	27	11	29	4.05191e+06	266530	21.502	-0.858	0	54.96	28.18	16.86	5.098	2.523	0.711	1.375	mS	1.20174	0.410901	23.731	0.232928	0.280211	8.58189	0.0271418	0.394029	44.0902
322	H35	2022	10	27	11	32	4.0519e+06	266646	21.292	-1.068	0	59.72	24.87	15.41	4.783	2.496	0.692	1.456	mS	1.52508	0.429349	25.1289	0.21575	0.275011	7.61147	0.0283454	0.49384	49.2646
323	H36	2022	10	27	11	36	4.0519e+06	266770	21.274	-1.086	0.62	79.13	10.9	9.35	3.418	1.885	0.715	3.218	(g)mS	1.45084	0.398323	22.7989	0.135412	0.268349	7.18758	0.0188398	1.1078	42.0959
324	H37	2022	10	27	11	41	4.0519e+06	266888	21.284	-1.076	10.78	61.53	15.79	11.9	3.001	3.504	0.188	2.186	gmS	1.51032	0.37421	21.0579	0.184935	0.643025	8.8767	0.0208338	3.81742	45.0065
325	H38	2022	10	27	11	45	4.05189e+06	267006	21.084	-1.276	0	77.99	12.13	9.88	3.57	2.061	0.711	3.089	mS	1.45746	0.404247	23.2358	0.177152	0.365914	7.80585	0.0226948	1.57302	10.9956
326	H39	2022	10	27	11	51	4.05189e+06	267136	19.692	-2.668	0.58	32.65	40.24	26.53	6.242	3.301	0.314	0.772	(g)sM	1.22472	0.490548	30.0472	0.259787	0.269189	9.87407	0.02631	0.078355	36.0052
327	H40	2022	10	28	10	10	4.05213e+06	265660	22.328	-0.032	0	15.9	49.33	34.77	6.912	2.781	0.334	0.591	sM	0.91242	0.625426	42.6879	0.613794	1.16123	7.91132	0.0775843	4.56197	36.4364
328	H40-1	2022	10	28	10	13	4.05213e+06	265718	22.527	0.167	0	6.98	53.87	39.15	7.334	2.64	0.2	0.549	M	1.10014	0.55638	35.8758	0.420713	0.510079	8.39204	0.0501324	0.744715	39.0236
329	H41	2022	10	28	10	20	4.05212e+06	265778	22.852	0.492	0	13.69	52.68	33.63	7	2.755	0.305	0.632	sM	1.1062	0.536439	34.0464	0.53578	0.59994	8.14829	0.0657537	0.534667	39.8321
330	H41-1	2022	10	28	10	25	4.05212e+06	265835	22.685	0.325	0	19.87	46.8	33.33	6.743	2.917	0.347	0.597	sM	1.18636	0.525244	33.0444	0.470005	0.631551	8.23891	0.0570469	1.34622	39.5087
331	H42	2022	10	28	10	41	4.05212e+06	265917	22.486	0.126	0	26	47.5	26.5	6.454	2.902	0.521	0.733	sM	1.15476	0.528984	33.3772	0.380418	0.533703	7.85799	0.0484117	1.27738	39.2392
332	H42-1	2022	10	28	10	40	4.05212e+06	265960	22.452	0.092	0	52.72	32.35	14.93	4.847	2.377	0.656	1.641	zS	1.40632	0.440105	25.9613	0.113898	0.171081	7.52029	0.0151454	0.476525	33.3641
333	H43	2022	10	28	10	43	4.05212e+06	266023	22.439	0.079	0	46.15	36.06	17.79	5.214	2.662	0.584	1.119	sZ	1.35814	0.439366	25.9037	0.173123	0.221573	8.27362	0.0209247	0.403748	37.1371
334	H43-1	2022	10	28	10	51	4.05212e+06	266093	22.378	0.018	0	65.4	22.46	12.14	4.154	2.052	0.692	2.142	mS	1.37496	0.444222	26.2835	0.145545	0.209358	6.67448	0.0218062	0.531775	38.4846
335	H44	2022	10	28	10	54	4.05212e+06	266141	22.238	-0.122	0	58.49	27.12	14.39	4.765	2.297	0.715	1.851	mS	1.35474	0.448809	26.6447	0.139815	0.187186	7.60414	0.0183868	0.394757	31.9088
336	H44-1	2022	10	28	10	57	4.05211e+06	266203	22.135	-0.225	0	53.19	30.26	16.55	5.09	2.499	0.7	1.522	mS	1.40208	0.432013	25.3339	0.145136	0.198607	8.51593	0.0170429	0.445592	42.2037
337	H45	2022	10	28	10	59	4.05211e+06	266263	21.943	-0.417	0	50.43	31.97	17.6	5.219	2.693	0.653	1.212	mS	1.3635	0.40017	22.9348	0.167637	0.210162	8.72343	0.0192168	0.354377	39.2931
338	H45-1	2022	10	28	11	4	4.05211e+06	266324	21.903	-0.457	0	73.34	17.45	9.21	3.693	1.67	0.613	3.284	mS	1.3307	0.446915	26.4953	0.13883	0.184074	7.85957	0.0176638	0.377037	41.44
339	H46	2022	10	28	11	20	4.05211e+06	266382	21.65	-0.71	0	57.28	28.48	14.24	4.645	2.371	0.633	1.684	mS	1.35418	0.412087	23.8198	0.180023	0.244831	8.1747	0.022022	0.540064	52.2291
340	H46-1	2022	10	28	11	40	4.0521e+06	266444	21.584	-0.776	0	69.02	18.14	12.84	4.28	2.203	0.694	2.147	mS	1.31746	0.415944	24.1094	0.104058	0.166644	9.63024	0.0108054	0.521548	53.6305
341	H47	2022	10	27	12	45	4.05211e+06	266511	21.48	-0.88	0	57.92	26.23	15.85	4.911	2.477	0.696	1.558	mS	1.3836	0.442193	26.1245	0.148834	0.222739	7.46672	0.019933	0.615874	57.134
342	H47-1	2022	10	27	12	41	4.05211e+06	266566	21.295	-1.065	0	63.27	22.07	14.66	4.739	2.36	0.717	1.759	mS	1.3588	0.436588	25.6877	0.117775	0.182883	8.18195	0.0143944	0.542573	57.134
343	H48	2022	10	27	12	37	4.0521e+06	266621	21.121	-1.239	0	48.31	32.8	18.89	5.487	2.771	0.666	1.109	sM	1.39774	0.442292	26.1323	0.215545	0.298313	7.91321	0.0272387	0.689734	52.283
344	H48-1	2022	10	27	12	32	4.05211e+06	266685	20.993	-1.367	0	57.8	24.86	17.34	5.087	2.697	0.686	1.222	mS	1.34664	0.440504	25.9925	0.198404	0.310065	9.09446	0.0218159	0.930505	47.3242
345	H49	2022	10	27	12	29	4.0521e+06	266743	21.145	-1.215	0	77.23	12.85	9.92	3.554	1.952	0.764	2.877	mS	1.38214	0.410861	23.728	0.210262	0.294283	7.60563	0.0276455	0.700176	48.24
346	H49-1	2022	10	27	12	25	4.0521e+06	266818	21.218	-1.142	0.17	93.64	2.79	3.4	2.104	1.188	0.165	1.899	(g)S	1.41014	0.349195	19.3127	0.126063	0.427883	9.71615	0.0129746	2.51516	41.0736
347	H50	2022	10	27	12	21	4.05209e+06	266868	21.096	-1.264	0	92.75	2.59	4.66	2.149	1.436	0.347	2.713	S	1.4244	0.412143	23.824	0.148544	0.469081	7.24623	0.0204994	2.67115	40.6316
348	H50-2	2022	10	27	12	17	4.05209e+06	266926	20.724	-1.636	0	78.64	10.58	10.78	3.533	2.166	0.687	3.112	mS	1.4049	0.42201	24.5683	0.137896	0.395002	8.04162	0.0171478	2.14255	47.3242
349	H51	2022	10	27	12	5	4.05209e+06	266980	20.59	-1.77	0	96.36	2.4	1.24	2.27	0.609	0.166	1.004	S	1.34524	0.395477	22.5904	0.107303	0.260699	6.20601	0.0172902	1.2783	39.6
350	H51-2	2022	10	27	12	10	4.05209e+06	267047	20.475	-1.885	0.31	93.73	3.45	2.51	2.348	0.836	0.202	1.808	(g)S	1.35898	0.443006	26.1881	0.160101	0.487715	7.64894	0.0209311	2.73012	37.4613
351	H52	2022	10	27	12	50	4.05209e+06	267100	20.287	-2.073	1.16	72.68	14.07	12.09	3.635	2.662	0.564	2.015	(g)mS	1.43846	0.419169	24.3529	0.176289	0.307716	7.38672	0.0238656	1.09523	41.0718
352	H52-2	2022	10	27	12	6	4.05209e+06	267142	20.0644	-2.2956	0.51	76.37	11.39	11.73	3.672	2.397	0.691	2.524	(g)mS	1.42302	0.416183	24.1275	0.162674	0.356114	7.14839	0.0227567	1.612	42.7427
353	H53	2022	10	27	11	59	4.05208e+06	267178	19.725	-2.635	0.38	75.9	12.82	10.9	3.514	2.286	0.704	2.323	(g)mS	1.45056	0.42287	24.6337	0.120229	0.195754	8.94811	0.0134363	0.629377	42.8505
354	H54	2022	10	25	10	4	4.05233e+06	265616	22.822	0.462	5.68	20.96	45.41	27.95	6.498	3.6	0.2	1.063	gM	1.302	0.462678	27.7518	0.324155	0.380109	9.22985	0.0351203	0.466283	48.5639
355	H55	2022	10	25	9	21	4.05234e+06	265747	22.829	0.469	0	22.85	50.35	26.8	6.557	2.867	0.483	0.746	sM	1.1899	0.517753	32.3836	0.320856	0.400861	7.93352	0.040443	0.666708	54.6623
356	H56	2022	10	25	9	8	4.05233e+06	265851	22.639	0.279	0	64.62	23.01	12.37	4.496	2.122	0.711	1.951	mS	1.29888	0.472298	28.5332	0.179614	0.52465	9.70065	0.0185157	2.8753	37.68
357	H57	2022	10	25	9	0	4.05232e+06	265976	22.543	0.183	0	78.59	11.54	9.87	3.628	1.781	0.649	3.273	mS	1.36616	0.382075	21.6193	0.0995437	0.19605	11.8017	0.00843468	0.804217	32.7173
358	H58	2022	10	25	8	55	4.05232e+06	266093	22.213	-0.147	0.36	62.86	24.4	12.38	4.284	2.273	0.572	1.982	(g)mS	1.39636	0.409977	23.662	0.148117	0.252058	7.74812	0.0191165	0.866175	38.3229
359	H59	2022	10	25	8	52	4.05231e+06	266217	22.004	-0.356	0	71.54	18.35	10.11	3.946	1.848	0.673	2.824	mS	1.41132	0.42142	24.5235	0.11633	0.211044	10.1082	0.0115085	0.789288	32.1783
360	H60	2022	10	25	8	36	4.05231e+06	266335	21.818	-0.542	0	72.74	19.13	8.13	3.506	1.962	0.706	2.045	zS	1.40924	0.425604	24.8421	0.0773953	0.151237	6.92378	0.0111782	0.615347	37.1371
361	H61	2022	10	25	8	49	4.0523e+06	266460	21.566	-0.794	0.14	74.52	18.01	7.33	3.585	1.648	0.651	2.251	(g)mS	1.2627	0.422078	24.5735	0.159123	0.219803	7.50142	0.0212124	0.505664	33.7087
362	H62	2022	10	25	8	53	4.0523e+06	266575	21.303	-1.057	0	67.03	16.89	16.08	4.7	2.937	0.551	2.097	mS	1.41314	0.41881	24.3258	0.153934	0.195502	8.42785	0.0182649	0.346406	32.4478
363	H63	2022	10	25	9	12	4.05229e+06	266696	21.4	-0.96	0.94	79.85	10.55	8.66	3.212	1.988	0.61	3.693	(g)mS	1.303	0.436865	25.7093	0.112418	0.231127	6.92114	0.0162427	0.989241	37.04
364	H64	2022	10	25	9	17	4.0523e+06	266823	21.326	-1.034	0.34	89.82	4.58	5.26	2.456	1.47	0.312	3.164	(g)S	1.28294	0.379982	21.4693	0.104599	0.401608	7.74298	0.0135088	2.47508	32.6088
365	H65	2022	10	25	9	22	4.05229e+06	266938	21.129	-1.231	0	92.93	2.83	4.24	2.288	1.191	0.283	2.563	S	1.20548	0.367346	20.573	0.118038	0.267436	9.27267	0.0127297	1.24498	42.966
366	H66	2022	10	25	9	26	4.05229e+06	267042	20.901	-1.459	1.88	91.47	3.18	3.47	2.182	1.524	0.047	2.934	(g)S	1.38526	0.386195	21.9158	0.0576798	0.388413	6.99947	0.00824059	2.75611	42.966
367	H67	2022	10	25	9	30	4.05229e+06	267161	19.653	-2.707	0	88.99	5.32	5.69	2.816	1.408	0.499	5.594	mS	1.33442	0.455565	27.1811	0.133558	0.243251	10.2645	0.0130116	0.914107	37.4759
368	OC3	2022	10	26	11	12	4.05148e+06	265915	22.678	0.318	0	28.53	55.84	15.63	5.375	2.251	0.543	1.413	sZ	1.24382	0.477133	28.9303	0.187416	0.25792	8.05238	0.0232747	0.587534	45.0065
369	OC4	2022	10	26	11	3	4.05151e+06	266004	22.491	0.131	0	68.23	22.94	8.83	3.733	1.765	0.595	2.423	zS	1.409	0.414921	24.0325	0.119197	0.197991	9.97625	0.0119481	0.656613	40.88
370	OC5	2022	10	26	10	56	4.05154e+06	266113	22.302	-0.058	0	66.99	21.94	11.07	3.989	1.968	0.668	2.313	mS	1.2925	0.409174	23.6021	0.124874	0.207546	8.9254	0.0139909	0.688934	40.2094
371	OC6	2022	10	26	10	49	4.05152e+06	266219	22.274	-0.086	0	61.57	27.18	11.25	4.098	2.102	0.66	1.758	zS	1.45598	0.422946	24.6395	0.11152	0.16931	8.0434	0.0138648	0.481581	40.6963
372	OC7	2022	10	26	10	42	4.0515e+06	266314	22.066	-0.294	0	67.71	20.73	11.56	4.11	1.955	0.683	2.527	mS	1.33926	0.435797	25.6264	0.0777173	0.152784	8.72612	0.00890627	0.625554	43.7004
373	OC8	2022	10	26	10	36	4.05153e+06	266418	21.832	-0.528	0	59.24	27.62	13.14	4.593	2.031	0.667	1.749	zS	1.39316	0.426725	24.9278	0.116213	0.18711	11.6949	0.00993708	0.590808	39.9938
374	OC9	2022	10	26	10	30	4.05155e+06	266517	21.517	-0.843	0	43.91	36.51	19.58	5.538	2.722	0.642	1.088	sM	1.3097	0.46922	28.282	0.172945	0.25532	7.92662	0.0218182	0.686458	38.0534
375	OC10	2022	10	27	8	57	4.05159e+06	266617	21.241	-1.119	0.24	68.96	21.9	8.9	3.871	1.973	0.714	1.912	(g)mS	1.4438	0.429298	25.125	0.0769869	0.157735	7.60938	0.0101174	0.6729	32.8251
376	OC11	2022	10	27	9	2	4.05162e+06	266726	20.948	-1.412	0	47.4	37.27	15.33	4.924	2.499	0.538	1.121	sZ	1.30308	0.44297	26.1853	0.0877901	0.198995	8.03507	0.0109259	0.926706	33.5258
377	OC12	2022	10	27	9	11	4.05164e+06	266829	20.861	-1.499	1.46	68.12	21.26	9.16	3.67	2.26	0.661	1.871	(g)mS	1.33714	0.375623	21.1583	0.15073	0.229785	9.85285	0.0152981	0.658793	36.2747
378	OC13	2022	10	27	9	15	4.05167e+06	266928	21.013	-1.347	3.85	67.91	17.32	10.92	3.661	2.682	0.507	2.417	(g)mS	1.39206	0.409816	23.6499	0.219347	0.316983	9.39229	0.023354	0.813633	34.0648
379	OC14	2022	10	27	9	34	4.05172e+06	267108	24.064	1.704	23.82	75.73	0.15	0.3	-0.31	1.169	-0.261	1.151	gS	1.28516	0.179407	8.88621	0.022955	0.822198	8	-0.000148684	6.66035	44.8987
380	wh-1	2022	10	26	10	18	4.05129e+06	266004	22.528	0.168	2.38	66.3	18.04	13.28	4.382	2.903	0.555	2.167	(g)mS	1.43508	0.407266	23.46	0.196673	0.276767	8.24133	0.0238642	0.667456	44.8987
381	wh-2	2022	10	26	10	39	4.05131e+06	266388	21.9	-0.46	0	56.25	31.05	12.7	4.66	2.073	0.708	1.837	zS	1.35428	0.444045	26.2696	0.117498	0.182596	9.46059	0.0124197	0.542481	40.96
382	wh-3	2022	10	26	8	51	4.05136e+06	266672	21.21	-1.15	0.62	66.12	19.3	13.96	4.621	2.549	0.643	2.021	(g)mS	1.42288	0.405523	23.3304	0.115997	0.186752	8.12357	0.014279	0.589632	33.6875
383	wh-4	2022	10	26	9	40	4.05097e+06	265911	22.669	0.309	0	37.98	45.25	16.77	5.333	2.442	0.554	1.233	sZ	1.28994	0.451947	26.8932	0.313763	0.372958	8.88618	0.0353091	0.493289	40.8023
384	wh-5	2022	10	26	9	21	4.05102e+06	266278	22.009	-0.351	0	72.61	18.72	8.67	3.823	1.687	0.655	3.242	zS	1.25392	0.440529	25.9945	0.120809	0.200238	9.14921	0.0132043	0.661914	33.6875
385	wh-6	2022	10	26	9	3	4.05105e+06	266623	21.217	-1.143	0	66.83	20.85	12.32	4.535	2.158	0.722	2.155	mS	1.32936	0.443669	26.2401	0.0783666	0.14944	8.72692	0.00897987	0.59228	33.3102
386	wh-7	2022	10	26	9	42	4.05069e+06	265877	22.72	0.36	0	62.13	25.67	12.2	4.548	2.11	0.714	2.087	zS	1.34014	0.460228	27.5545	0.192151	0.262369	10.0111	0.0191939	0.585147	37.52
387	wh-8	2022	10	26	9	58	4.05072e+06	266324	21.892	-0.468	0	70.14	20.13	9.73	3.937	1.705	0.652	3.059	zS	1.34206	0.425431	24.8289	0.153795	0.204225	9.48861	0.0162084	0.420246	32.56
388	wh-9	2022	10	26	8	45	4.05072e+06	266628	21.011	-1.349	0	61.02	23.39	15.59	4.9	2.477	0.695	1.455	mS	1.42208	0.410486	23.7	0.145217	0.219448	11.2278	0.0129338	0.618589	31.4237
389	wh-10	2022	10	26	9	27	4.05035e+06	265962	22.396	0.036	0	45.26	38.75	15.99	5.159	2.36	0.655	1.373	sZ	1.32008	0.44347	26.2245	0.192737	0.247825	11.8493	0.0162657	0.459066	41.2874
390	wh-11	2022	10	26	8	59	4.05037e+06	266339	21.306	-1.054	0	57.83	29.28	12.89	4.576	2.148	0.686	1.79	zS	1.3177	0.391155	22.2752	0.107239	0.169314	9.4094	0.011397	0.517289	32.6095
391	wh-12	2022	10	26	9	16	4.05014e+06	266066	21.962	-0.398	0	45.3	31.57	23.13	5.898	3.137	0.65	0.752	sM	1.36716	0.434724	25.5432	0.293597	0.328779	10.1923	0.0288057	0.293187	38.4307
392	wh-13	2022	10	25	10	30	4.0526e+06	265758	22.926	0.566	0	63.27	25.27	11.46	4.089	2.094	0.672	1.714	zS	1.27728	0.449542	26.7026	0.179074	0.23413	9.99918	0.0179088	0.458798	40.8023
393	wh-14	2022	10	25	11	4	4.05282e+06	266021	22.536	0.176	2.07	53.91	31.17	12.85	4.477	2.376	0.589	1.435	(g)mS	1.41474	0.412778	23.8716	0.154385	0.209029	8.83453	0.0174751	0.455369	47.3242
394	wh-15	2022	10	25	10	30	4.05298e+06	266298	21.734	-0.626	0	51.07	35.41	13.52	4.681	2.447	0.511	1.598	zS	1.34204	0.473267	28.6126	0.215678	0.275576	8.60147	0.0250745	0.499151	39.4009
395	wh-16	2022	10	25	10	51	4.05251e+06	266152	22.563	0.203	1.79	56.86	27.63	13.72	4.521	2.81	0.422	1.91	(g)mS	1.11566	0.457439	27.3309	0.247919	0.812072	11.0977	0.0223398	4.70127	41.1257
396	wh-17	2022	10	25	10	18	4.05272e+06	266421	21.757	-0.603	0.14	49.51	36.92	13.43	4.682	2.326	0.547	1.47	(g)sM	1.36928	0.447163	26.5148	0.202769	0.261307	8.44782	0.0240026	0.487813	40.8023
397	wh-18	2022	10	25	10	5	4.05297e+06	266585	21.176	-1.184	0	54.82	31.42	13.76	4.627	2.451	0.557	1.453	zS	1.19768	0.428485	25.0626	0.178237	0.307873	10.421	0.0171037	1.0803	40.24
398	wh-19	2022	10	25	9	0	4.05252e+06	266647	21.639	-0.721	0	92.14	4.12	3.74	2.6	1.023	0.349	3.092	S	1.38068	0.43433	25.5128	0.130941	0.218389	8.37606	0.0156327	0.72874	31.2697
399	wh-20	2022	10	25	9	43	4.05269e+06	266759	21.623	-0.737	0	78.3	13.77	7.93	3.21	2.018	0.655	2.507	mS	1.28442	0.424021	24.7213	0.191647	0.312146	9.19654	0.020839	1.00416	32.56
400	wh-21	2022	10	25	9	55	4.05313e+06	266806	21.686	-0.674	0.54	96.64	1.21	1.61	1.618	0.923	-0.23	1.371	(g)S	1.43416	0.38572	21.8816	0.0553395	0.626737	9.74202	0.0056805	4.76164	31.1111
